# Supplementary material
Source: publisher figshare collection journal article supplement (https://tandf.figshare.com/articles/dataset/_/6798797)
Supplement: Supplementary file 3 [file 3]

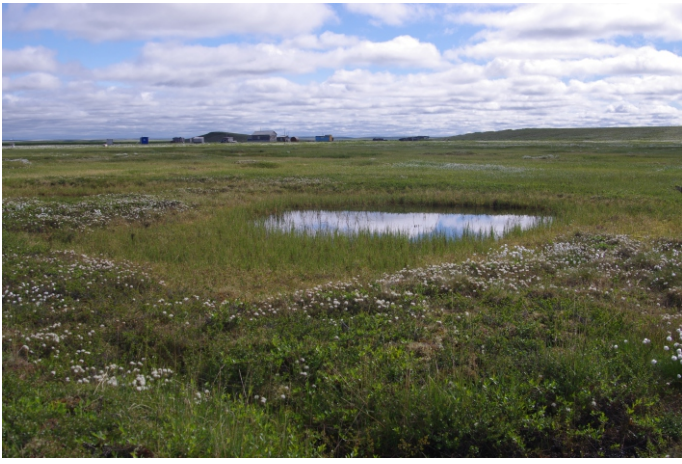

A Polygon at 12Kyt-0807-1

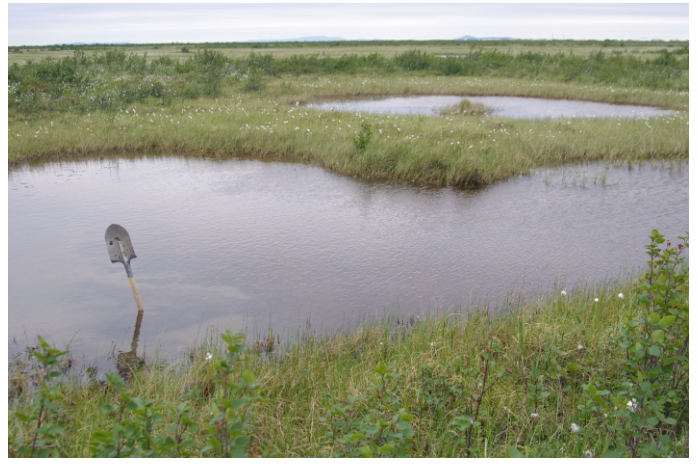

B Polygon at 12P-1707-1

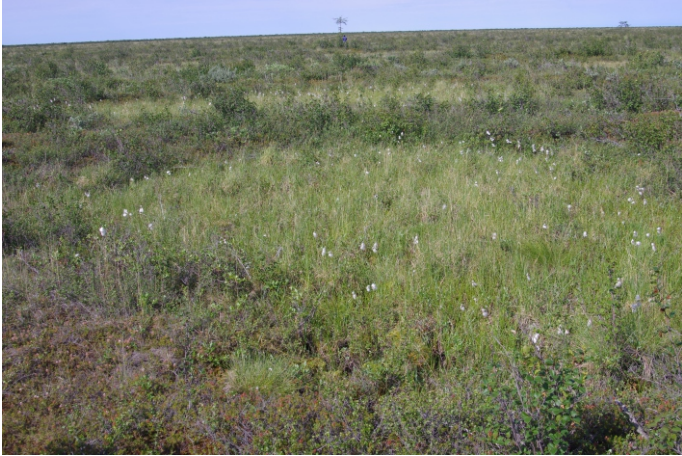

C Polygon at 12P-2107-2

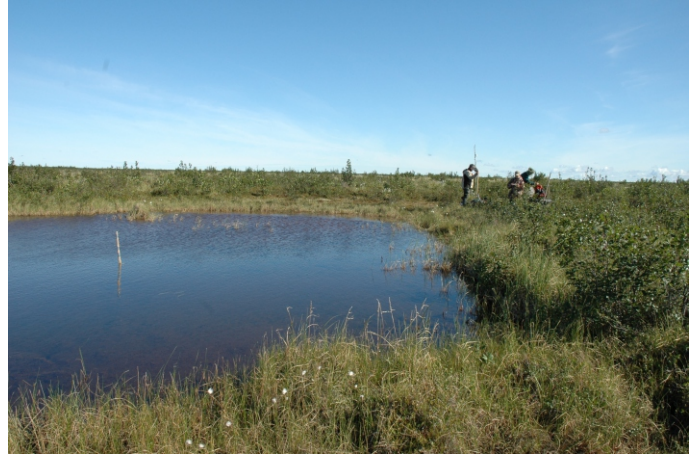

D Monitoring polygon at 12P-1607-1

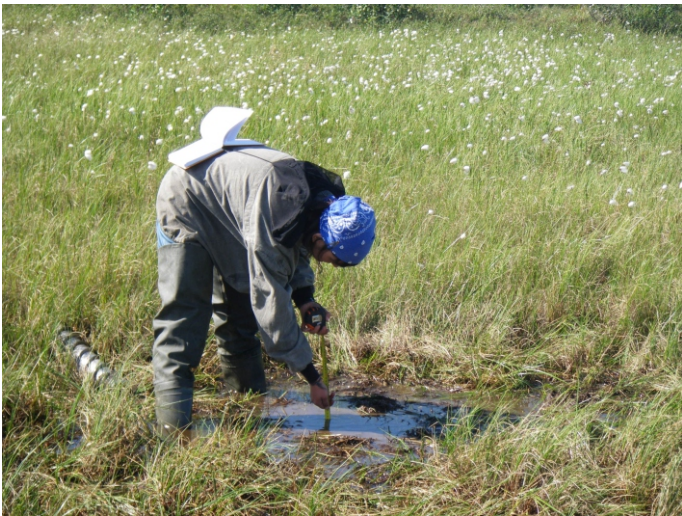

E Polygon at 12P-1907-2

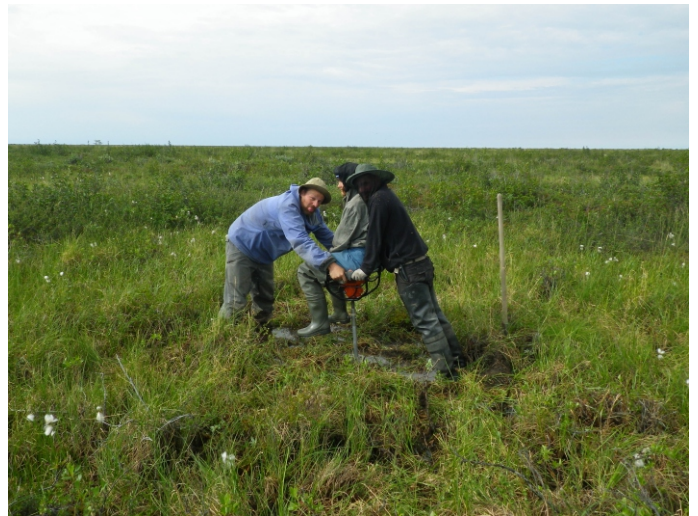

F Polygon at 12P-2107-1

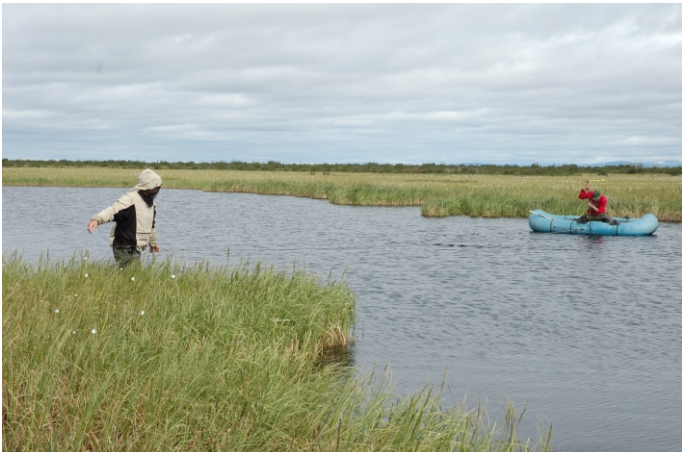

G Coalesced polygon at S-20

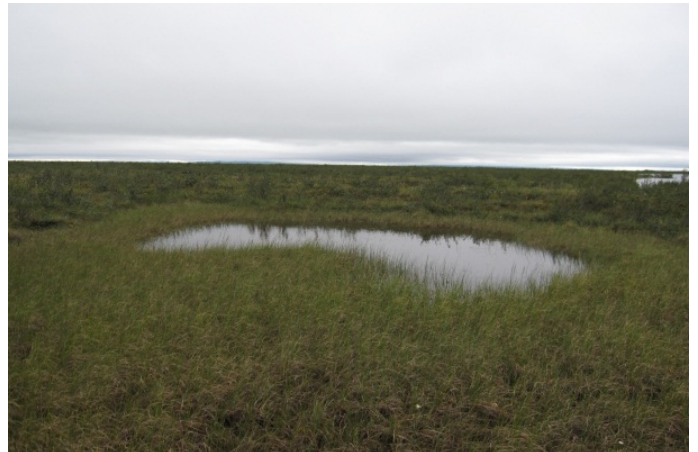

H Polygon at S-36
