# Supplementary material
Source: publisher figshare collection journal article supplement (https://tandf.figshare.com/articles/dataset/_/6798797)

## Polygon center cores

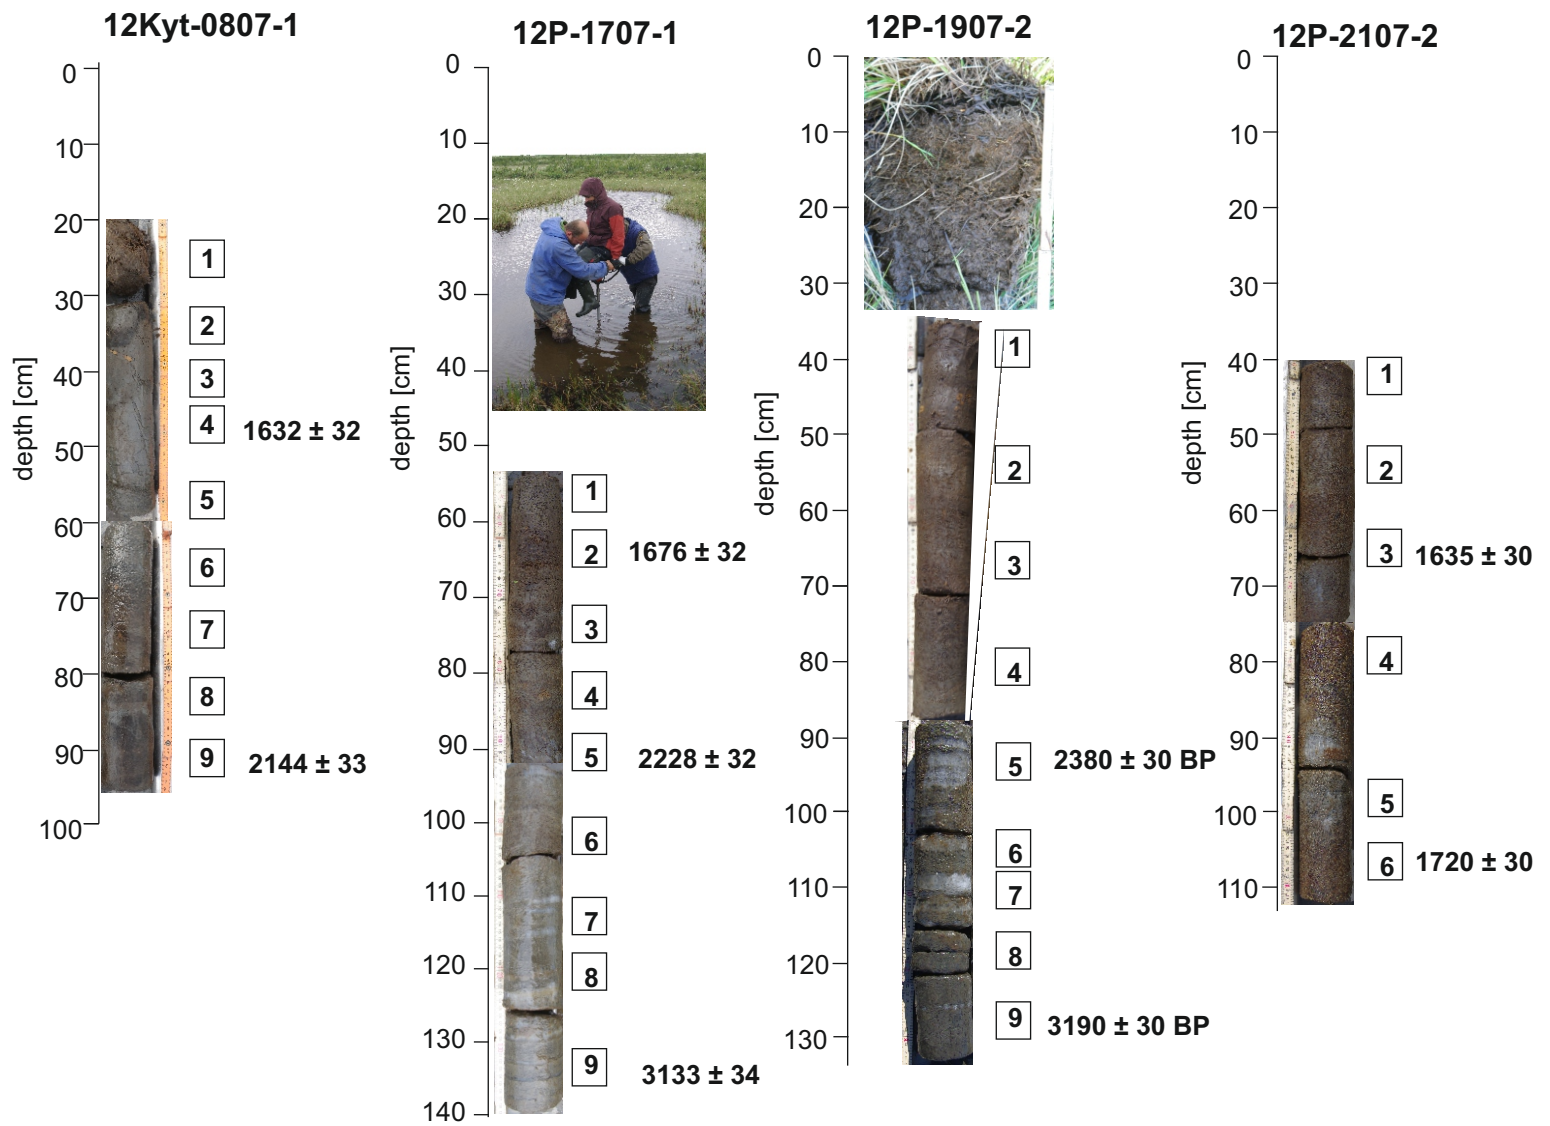

## Polygon rim cores

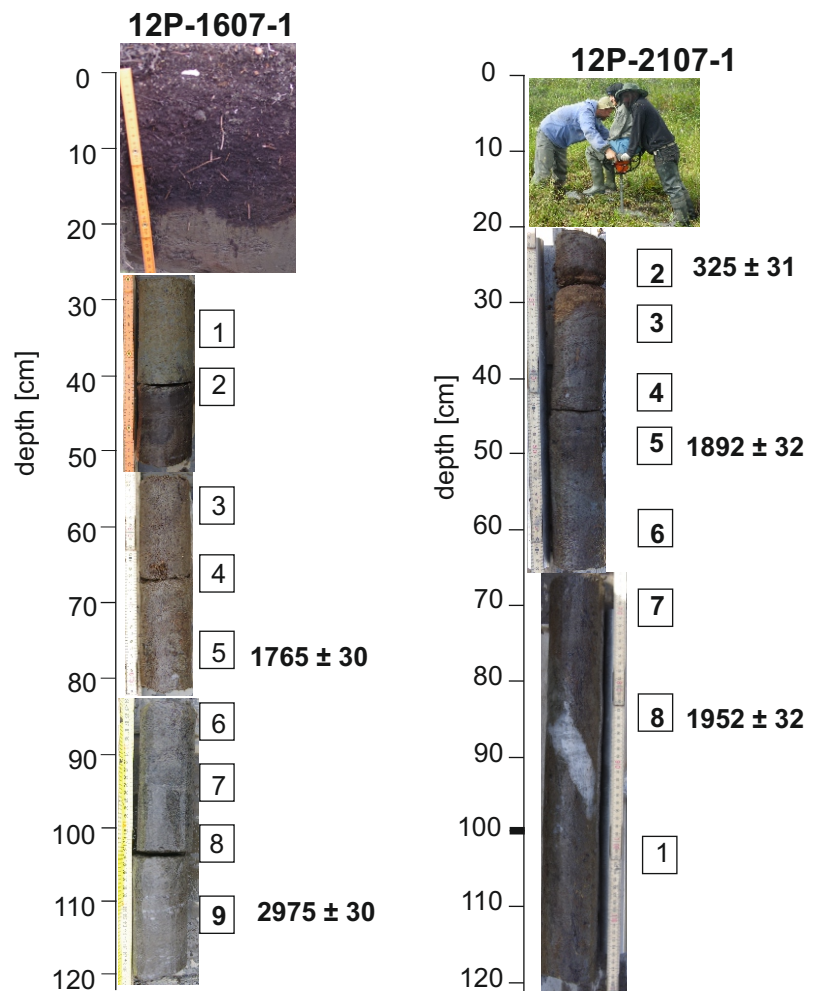

Supplement: Supplementary file 1 [file 3]

center cores

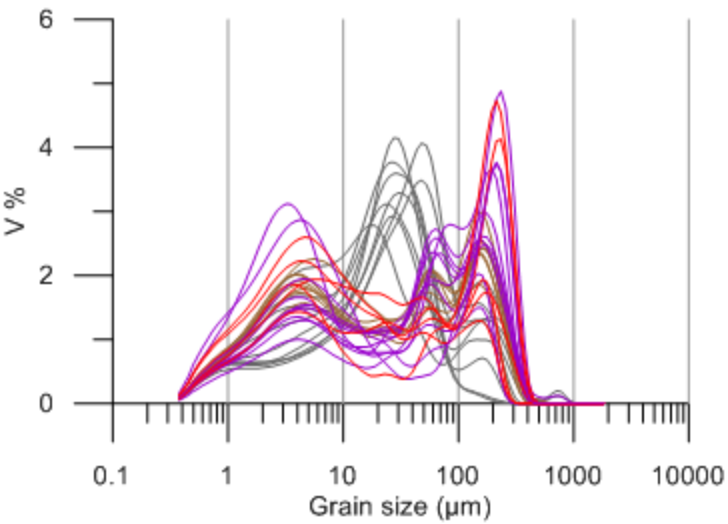

rim cores

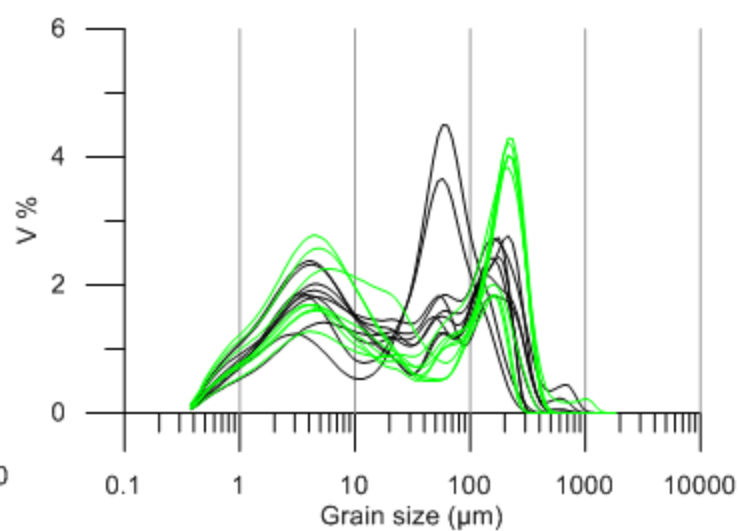

pond cores

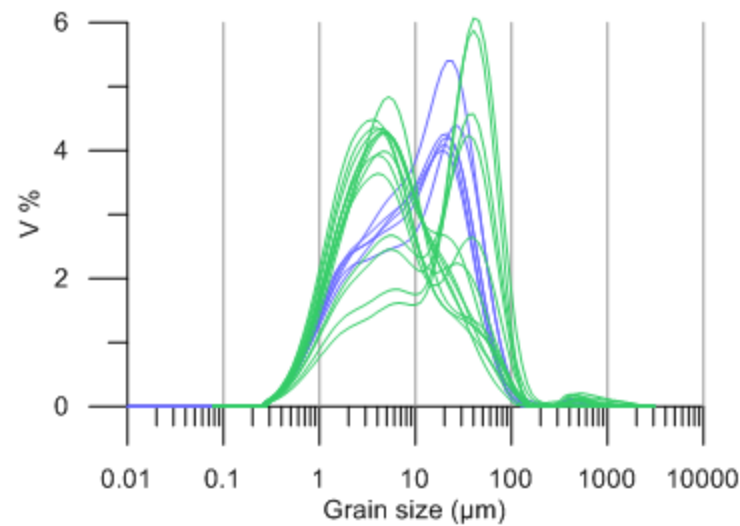

— 12Kyt-0807-1    — 12P-1707-1  
— 12P-1907-2    — 12P-2107-2

— 12P-1607-1    — 12P-2107-1

— S 36  
— S 20

Supplement: Supplementary file 2 [file 3]
